# Supplementary material for: Carbide decorated carbon nanotube electrocatalyst for high-efficiency hydrogen evolution from seawater
Source: Royal Society of Chemistry journal article supplement (doi:10.1039/c6ra17839a), 2016-01-01
Supplement: c6ra17839a1.pdf [file c6ra17839a1.pdf]

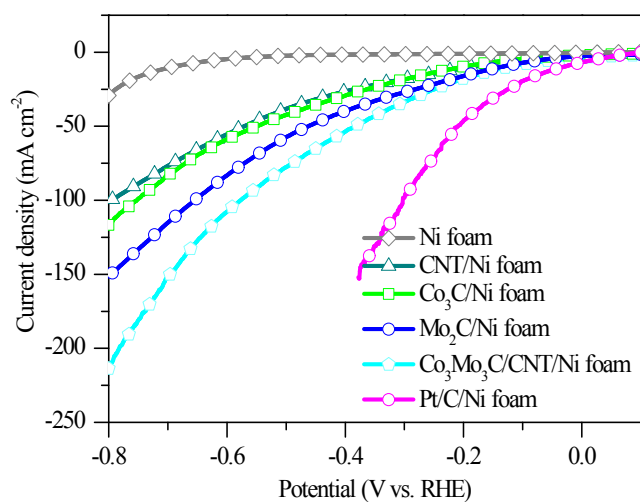

**Fig. S1.** Polarization curves of various electrodes.

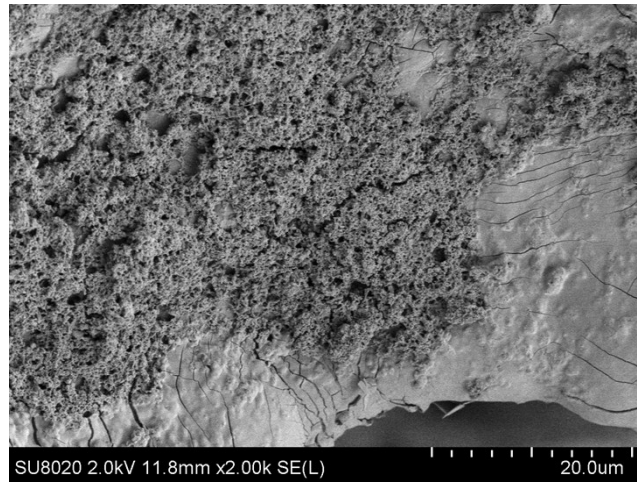

**Fig. S2.** SEM image of Ni foam supported Co<sub>3</sub>Mo<sub>3</sub>C/CNT.

From top view SEM image of Ni foam supported Co<sub>3</sub>Mo<sub>3</sub>C/CNT, it is apparent that Ni foam is almost completely covered by Co<sub>3</sub>Mo<sub>3</sub>C/CNT electrocatalysts.
